# Supplementary figures and images for: Distributed task-specific processing of somatosensory feedback for voluntary motor control
Source: eLife journal article supplement (doi:10.7554/elife.13141), 2016-04-14

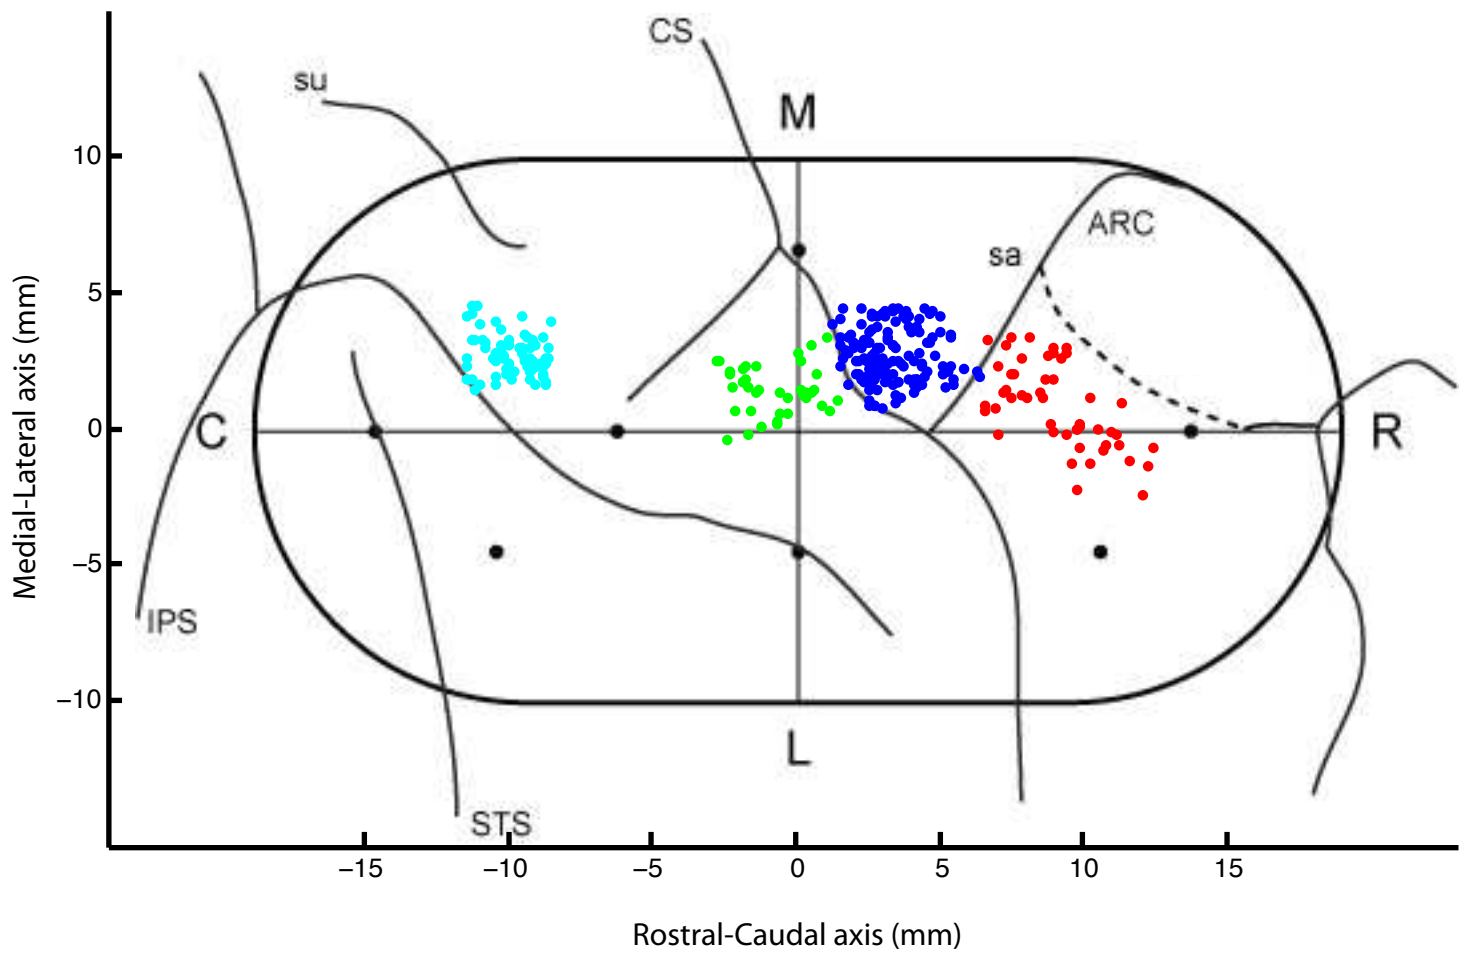

Supplement: supp [file elife-13141-supp-v1.zip]
